## 1 Base Pairing and Functional Insights into $N^3$ -methylcytidine ( $m^3C$ ) in RNA

2  
3 Song Mao,<sup>1,2</sup> Phensinee Haruehanroengra,<sup>1,2</sup> Srivathsan V. Ranganathan,<sup>2</sup> Fusheng Shen,<sup>1,2</sup>  
4 Thomas J. Begley,<sup>2,3</sup> Jia Sheng<sup>1,2,\*</sup>

5 <sup>1</sup>Department of Chemistry, <sup>2</sup>The RNA Institute, <sup>3</sup>Department of Biological Science, University at  
6 Albany, State University of New York, 1400 Washington Ave. Albany, NY, 12222, USA.

7 Email: [jsheng@albany.edu](mailto:jsheng@albany.edu)

### 10 ABSTRACT:

11  
12  $N^3$ -methylcytidine ( $m^3C$ ) is present in both eukaryotic tRNA and mRNA and plays  
13 critical roles in many biological processes. We report the synthesis of the  $m^3C$   
14 phosphoramidite building block and its containing RNA oligonucleotides. The  
15 base-pairing stability and specificity studies show that the  $m^3C$  modification  
16 significantly disrupts the stability of the Watson-Crick C:G pair. Further  $m^3C$   
17 decreases the base pairing discrimination between C:G and the other mismatched C:A,  
18 C:U, and C:C pairs. Our molecular dynamic simulation study further reveals the  
19 detailed structural insights into the  $m^3C$ :G base pairing pattern in an RNA duplex.  
20 More importantly, the biochemical investigation of  $m^3C$  using reverse transcription  
21 shows that  $N^3$ -methylation specifies the C:A pair and induces a G to A mutation using  
22 HIV-1-RT, MMLV-RT and MutiScribe<sup>TM</sup>-RT enzymes, all with relatively low  
23 replication fidelity. For other reverse transcriptases with higher fidelity like AMV-RT,  
24 the methylation could completely shut down DNA synthesis.

### 26 INTRODUCTION

27  
28 Natural RNA systems in all organism, from the simplest prokaryote  
29 *Nanoarchaeum equitans* to humans, utilize the four regular nucleosides (adenosine,  
30 guanosine, cytidine, and uridine) and a variety of post-transcriptional modifications to  
31 achieve structural and functional specificity and diversity. (Nachtergaele and He, 2017)  
32 To date, more than 160 distinct chemical modifications that decorate different  
33 positions of nucleobases, ribose and phosphate backbone in RNA nucleotides have  
34 been discovered, (Basanta-Sanchez et al., 2016; Boccaletto et al., 2018; Cantara et al.,  
35 2011; Machnicka et al., 2013; Wu et al., 2020) since the first discovery of the  
36 modified nucleoside in the 1950s. (Holley et al., 1965a; Holley et al., 1965b) Many  
37 RNA modifications have been demonstrated to play critical roles in both normal and  
38 disease cellular functions and processes, such as development, circadian rhythms,  
39 embryonic stem cell differentiation, meiotic progression, temperature adaptation,  
40 stress response and tumorigenesis, etc. (Machnicka et al., 2013) Similar to DNA and  
41 protein based epigenetic markers, RNA modifications (also termed the  
42 ‘epitranscriptome’) are dynamically and reversibly regulated by specific reader, writer  
43 and eraser enzymes, representing a new layer of gene regulation. (Roundtree et al.,

44 2017) Accordingly, RNA modification-associated enzymes, as an important research  
45 frontier towards RNA-based drug discovery, have become useful molecular tools and  
46 drug targets. (Jiang et al., 2017)

47

48 Benefiting from a variety of recently developed chemical biology tools and  
49 high-throughput detection strategies, RNA methylation has been identified in different  
50 RNAs from all organisms.(Clark et al., 2016; Hori, 2014; Mongan et al., 2019;  
51 Nachtergaele and He, 2018; Roundtree et al., 2017; Sergiev et al., 2018; Song and Yi,  
52 2017) In addition, corresponding writers and erasers and bonding proteins (“readers”)  
53 (Shi et al., 2019) have been identified for many RNA methylation and been shown to  
54 impact numerous biological functions and diseases processes. For example, the tRNA  
55 methylations 5-methylcytidine ( $m^5C$ ),  $N^1$ -methylguanidine ( $m^1G$ ),  
56  $N^1$ -methyladenosine ( $m^1A$ ),  $N^7$ -methylguanidine ( $m^7G$ ) and 2'-O-methylated sugar  
57 (2'-Nm) in the anticodon stem loops of transfer RNA (tRNA) are directly involved in  
58 the codon recognition and can induce or inhibit frameshifting mutations during  
59 translation. (Fu et al., 2014; Wang et al., 2014) In addition,  $N^6$ -methyladenosine ( $m^6A$ ),  
60 the most abundant internal mRNA methylation, is linked to numerous biological  
61 functions, including mRNA stability, RNA structure switches, mRNA splicing, RNA  
62 export, translation and miRNA biogenesis. (Desrosiers et al., 1974; Song and Yi, 2017;  
63 Zaccara et al., 2019) Moreover, RNA methylation also has been found in viral RNA,  
64 which impacts viral gene expression and has great potential for stimulating  
65 therapeutic developments. (Chen et al., 2019a; Ciuffi, 2016; Lichinchi et al., 2016;  
66 Wu, 2019)

67

68  $N^3$ -methylcytidine ( $m^3C$ ), first discovered in *Saccharomyces cerevisiae* total  
69 RNA (Hall, 1963) and later found in eukaryotic tRNA (Clark et al., 2016; Cozen et al.,  
70 2015; D'Silva et al., 2011; Han et al., 2017; Iwanami and Brown, 1968; Noma et al.,  
71 2011; Olson et al., 1981), occurs most frequently in anticodon stem loops to impact  
72 tRNA structure, affinity for the ribosome and decoding activity. The working enzymes  
73 responsible for  $m^3C$  in tRNA are the methyltransferase Trm140 or the complex of  
74 Trm140 and Trm141 (METTL2 and METTL6). Recently, Fu and coworkers reported  
75 the new discovery of METTL8 as an mRNA  $m^3C$  writer enzyme and provided the  
76 first evidence of the existence of  $m^3C$  modification in the mRNA of mice and humans,  
77 (Liu and He, 2017; Xu et al., 2017) The  $m^3C$  modification may play versatile roles in  
78 impacting mRNA processing and biological functions. More interestingly,  $m^3C$  has  
79 been uniquely detected in the viral RNAs from Huh7, ZIKV and DENV virions and  
80 the cells with these virus infections. (McIntyre et al., 2018) The  $m^3C$  modification  
81 also has the potential to be demethylated by eraser enzymes. Alkylation repair  
82 homolog 3 (ALKBH3), as well as its bacterial ancestor Alkb, have been shown to  
83 demethylate the  $m^3C$  in tRNA to affect RNA stability and prevent degradation.(Chen  
84 et al., 2019b; Ougland et al., 2004) ALKBH3 expression has also been linked to tumor  
85 progression and the regulation of protein synthesis, suggesting  $m^3C$  plays a prominent  
86 role in cancer biology. (Ueda et al., 2017)

87

88           Although much effort went in to the discovery and detection of m<sup>3</sup>C, little is  
89 known about its fundamental properties and biological functions. Since the  
90 N<sup>3</sup>-position directly participates in the Watson-Crick pairing, this methylation is  
91 expected to disrupt the C:G pair and reduce the base pairing fidelity of cytosine. In  
92 addition, the methyl group on m<sup>3</sup>C might also regulate binding by RNA readers.  
93 Therefore, we hypothesize that the methylation at N<sup>3</sup>-position of cytidine is a cellular  
94 mechanism to modulate base pairing specificity and affect the efficiency and fidelity  
95 of transcription and reverse-transcription, thus increasing mutation rates, which could  
96 be beneficial to certain biological systems like virus. To the best of our knowledge, no  
97 chemical synthesis and base-pairing studies of RNA oligonucleotides containing m<sup>3</sup>C  
98 modification have been reported. In this work, we report the new chemical synthesis  
99 of m<sup>3</sup>C phosphoramidite building block and its incorporation into RNA  
100 oligonucleotides. The subsequent base-pairing stability and specificity studies of RNA  
101 duplexes containing one and two m<sup>3</sup>C residues at different positions support the idea  
102 that the m<sup>3</sup>C decreases both duplex stability and base pairing discrimination between  
103 C:G pair and other mismatched pairs. Our molecular dynamic simulation study further  
104 provides detailed structural insights into the m<sup>3</sup>C:G base pairing pattern in an RNA  
105 duplex. Furthermore, we used m<sup>3</sup>C in reverse transcription assays in the presence of  
106 AMV-RT, HIV-1-RT, MMLV-RT and MutiScribe™-RT and found that this  
107 methylation could specify the C:A pair for some RT enzymes with low fidelity, which  
108 would induce the G to A mutation. For reverse transcriptase enzymes with higher  
109 fidelity (i.e., AMV-RT), m<sup>3</sup>C could completely shut down DNA synthesis.

110

## 111 **RESULTS AND DISCUSSION**

### 112 **Chemical synthesis of m<sup>3</sup>C phosphoramidite building block and its containing** 113 **RNA oligonucleotides**

114

115           Although the synthesis of m<sup>3</sup>C nucleoside has been achieved, (Brookes and  
116 Lawley, 1962; Ogilvie and Kader, 1983) more general phosphoramidite building  
117 blocks are required to make different scales of RNA strands through the solid phase  
118 synthesis of oligonucleotides. We started the synthesis of m<sup>3</sup>C from the commercially  
119 available cytidine (**1**, **scheme 1**), which was directly methylated by using MeI without  
120 any base to obtain the m<sup>3</sup>C nucleoside. The sequential protections of the 5'-hydroxyl  
121 with dimethoxytrityl (DMTr) group and N<sup>4</sup> position with benzoyl (Bz) group yielded  
122 compound **4**. Subsequently, the 2'-hydroxyl group was protected with  
123 *tert*-butyldimethylsilyl (TBDMS) group to obtain compound **5**, which is the key  
124 intermediate to make the final phosphoramidite building block **6** for the  
125 oligonucleotides solid phase synthesis.

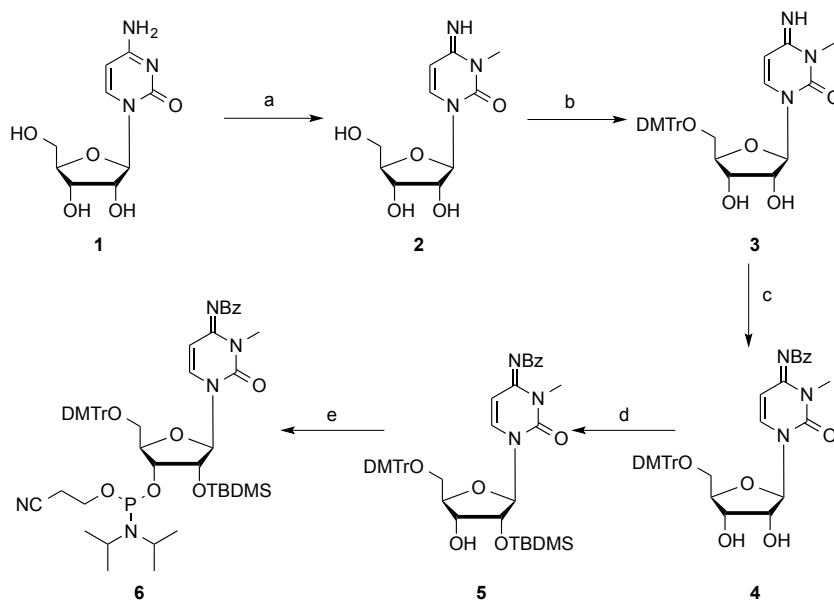

126

127 **Scheme 1.** Synthesis of *N*<sup>3</sup>-methyl-cytidine phosphoramidite **10**. Reagents and conditions: (a) MeI,  
 128 DMF; (b) DMTrCl, Py; (c) TMSCl, Py; BzCl; (d) TBDMSCl, imidazole, DMF; (e)  
 129 (*i*-Pr<sub>2</sub>N)<sub>2</sub>P(Cl)OCH<sub>2</sub>CH<sub>2</sub>CN, (*i*-Pr)<sub>2</sub>NEt, 1-methylimidazole, DCM.

130

131 As expected, the m<sup>3</sup>C phosphoramidite building block is well compatible with  
 132 the solid phase synthesis conditions including the trichloroacetic acid (TCA) and  
 133 oxidative iodine treatments, resulting in very similar coupling yields as the  
 134 commercially available native phosphoramidites. They are also stable in the basic  
 135 cleavage from the solid phase beads and the Et<sub>3</sub>N•3HF treatment to remove TBDMS  
 136 protecting groups during the RNA oligonucleotide deprotection and purification. As  
 137 the demonstration, six RNA strands containing this modification have been  
 138 synthesized and confirmed by ESI- or MALDI-MS, as shown in **Table 1**.

139 **Table 1.** RNA sequences containing m<sup>3</sup>C.

| Entry | RNA Sequences                                 | Measured (calc.) m/z                 |
|-------|-----------------------------------------------|--------------------------------------|
| ON1   | 5'-AAUGC <sup>m<sup>3</sup>C</sup> GCACUG-3'  | [M+H] <sup>+</sup> = 3807.5 (3807.6) |
| ON2   | 5'-GGACU <sup>m<sup>3</sup>C</sup> CCUGCAG-3' | [M+H] <sup>+</sup> = 3823.6 (3823.6) |
| ON3   | 5'-U <sup>m<sup>3</sup>C</sup> GUACGA-3'      | [M+H] <sup>+</sup> = 2523.1 (2522.4) |
| ON4   | 5'-GUA <sup>m<sup>3</sup>C</sup> GUAC-3'      | [M+H] <sup>+</sup> = 2522.5 (2522.4) |
| ON5   | 5'-CCGG <sup>m<sup>3</sup>C</sup> GCCGG-3'    | [M+H] <sup>+</sup> = 3203.7 (3203.5) |
| ON6   | 5'-CGCGAAUU <sup>m<sup>3</sup>C</sup> GC-3'   | [M+H] <sup>+</sup> = 3823.6 (3823.6) |

## 140 Thermal denaturation and base pairing studies of m<sup>3</sup>C RNA duplexes

141

142 We synthesized two sets of RNA strands to investigate the thermodynamic  
143 properties and base pairing specificity of m<sup>3</sup>C containing RNA duplexes. The  
144 normalized  $T_m$  curves of native and modified RNA duplexes, [5'-GGACUXCUGCAG-3' & 3'-CCUGAYGACGUC-5'] with Watson-Crick and  
145 other non-canonical base pairs (X pairs with Y), are shown in **Figure 1**. The detailed  
146 melting temperature data are summarized in **Table 2**. Compared to the native  
147 melting temperature data are summarized in **Table 2**. Compared to the native  
148 counterparts, m<sup>3</sup>C-modified RNA duplexes showed dramatically decreased thermal  
149 stability. In the native C:G paired 12-mer duplexes (compare entry 2 and 7), the m<sup>3</sup>C  
150 decreases the  $T_m$  by 19.7 °C, corresponding to a  $\Delta G^0$  reduction of 9.6 kcal/mol.  
151 Similarly, the non-canonical base paired (ex. C:A, C:U and C:C) duplexes containing  
152 this modification also showed significantly lower melting temperatures. The  $T_m$  drops  
153 by 9.9 °C in the C:A mismatched duplex (entry 3 vs 8), 7.0 °C in the C:U mismatched  
154 one (entry 4 vs 9) and 4.0 °C for the C:C mismatched one (entry 5 vs 10),  
155 corresponding to the  $\Delta G^0$  reduction of 4.5, 4.2 and 2.5 kcal/mol respectively.

156

157 These results indicate that m<sup>3</sup>C modification significantly disrupts the C:G  
158 pair and the overall duplex stability. Indeed, when we compared this modification  
159 with the native C in a self-complementary 10-mer duplex context  
160 (CCGGC\*GCCGG)<sub>2</sub>, where two consecutive m<sup>3</sup>C:G are introduced in the middle of  
161 the duplex, the  $T_m$  drops by 35.7 °C (entry 11 vs 12, **Table 2**), as shown in **Figure**  
162 **S34**. On the other hand, the comparison of base pairing specificity in this duplex  
163 system indicated that m<sup>3</sup>C decreases the discrimination between C:G pair and other  
164 mismatched C:A, C:U and C:C pairs (entries 7-9, **Table 2**). The lowest  $T_m$  difference  
165 is 3.2 °C between m<sup>3</sup>C:G-duplex and m<sup>3</sup>C:C-one, and the highest  $T_m$  difference is  
166 only 5.6 °C between m<sup>3</sup>C:G-duplex and m<sup>3</sup>C:A-one. In comparison, in the  
167 nonmodified native RNA duplexes, these  $T_m$  differences vary from 15.4 to 18.9 °C  
168 (entries 2-5), dramatically bigger than the modified m<sup>3</sup>C counterparts.

169

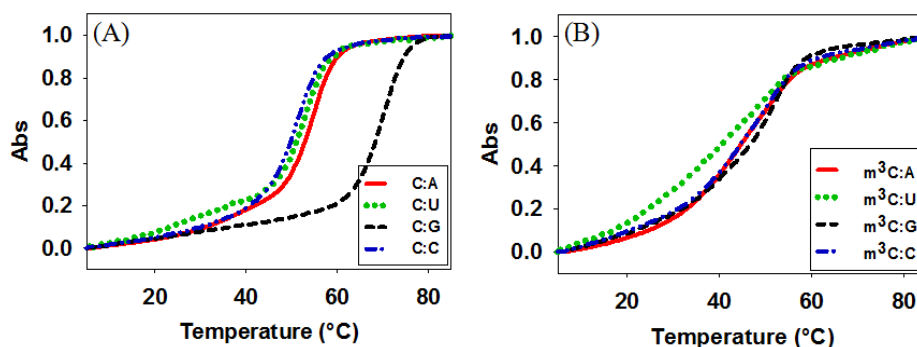

170

171 **Figure 1.** Normalized UV-melting curves of RNA duplexes. (A) Native sequence  
172 5'-GGACUCCUGCAG-3') pairs with matched and mismatched strands. (B) m<sup>3</sup>C modification  
173 sequence (5'-GGACUm<sup>3</sup>CCUGCAG-3') pairs with matched and mismatched sequences.

174

175

176 **Table 2.** Melting temperatures of native and m<sup>3</sup>C-modified RNA duplexes.

177

|                 | Entry | Sequences                                                        | Base pair          | $T_m$ (°C) <sup>a</sup> | $\Delta T_m$ (°C) <sup>b</sup> | $-\Delta G^0$ (kcal/mol) <sup>c</sup> |
|-----------------|-------|------------------------------------------------------------------|--------------------|-------------------------|--------------------------------|---------------------------------------|
| <b>Duplex-1</b> | 1     | <b>I:</b> 5'-GGACU <b>C</b> CUGCAG-3'                            |                    |                         |                                |                                       |
|                 | 2     | <b>I</b> + 3'-CCUGA <b>G</b> GACAUC-5'                           | C:G                | 69.6                    |                                | 20.6                                  |
|                 | 3     | <b>I</b> + 3'-CCUGA <b>A</b> GACAUC-5'                           | C:A                | 54.2                    | -15.4                          | 14.0                                  |
|                 | 4     | <b>I</b> + 3'-CCUGA <b>U</b> GACAUC-5'                           | C:U                | 52.9                    | -16.7                          | 14.3                                  |
|                 | 5     | <b>I</b> + 3'-CCUGA <b>C</b> GACAUC-5'                           | C:C                | 50.7                    | -18.9                          | 12.4                                  |
|                 | 6     | <b>II:</b> 5'-GGACU <b>m<sup>3</sup>C</b> CUGCAG-3'              |                    |                         |                                |                                       |
|                 | 7     | <b>II</b> + 3'-CCUGA <b>G</b> GACAUC-5'                          | m <sup>3</sup> C:G | 49.9                    |                                | 11.0                                  |
|                 | 8     | <b>II</b> + 3'-CCUGA <b>A</b> GACAUC-5'                          | m <sup>3</sup> C:A | 44.3                    | -5.6                           | 9.5                                   |
|                 | 9     | <b>II</b> + 3'-CCUGA <b>U</b> GACAUC-5'                          | m <sup>3</sup> C:U | 45.9                    | -4.0                           | 10.1                                  |
|                 | 10    | <b>II</b> + 3'-CCUGA <b>C</b> GACAUC-5'                          | m <sup>3</sup> C:C | 46.7                    | -3.2                           | 9.9                                   |
| <b>Duplex-2</b> | 11    | <b>III:</b> (5'-CCGG <b>C</b> GCCGG-3') <sub>2</sub>             | C:G                | 74.6                    |                                | 18.3                                  |
|                 | 12    | <b>IV:</b> (5'-CCGG <b>m<sup>3</sup>C</b> GCCGG-3') <sub>2</sub> | m <sup>3</sup> C:G | 38.9                    | -35.7                          | 7.8                                   |

178 <sup>a</sup> The  $T_m$ s were measured in sodium phosphate (10 mM, pH 7.0) buffer containing 100 mM NaCl,  $T_m$   
 179 values reported are the averages of four measurements.

180 <sup>b</sup>  $\Delta T_m$  values are relative to the duplexes with only Watson-Crick pairs.

181 <sup>c</sup> Obtained by non-linear curve fitting using Meltwin 3.5.(McDowell and Turner, 1996)

182

183 In addition, we also evaluated the impact of multiple m<sup>3</sup>C modifications at  
 184 different positions using a longer 22-mer RNA duplex template. As shown in **Table 3**  
 185 and **Figure S35**, the  $T_m$  of RNA duplex containing a single m<sup>3</sup>C residue at C17  
 186 position (close to the 3' end) drops by 5.5 °C (entry 2 vs 4, **Table 3**). In comparison,  
 187 the  $T_m$  of the one containing two m<sup>3</sup>C residues at C17 and C19 positions decreases by  
 188 only 6.5 °C (entry 2 vs 4 vs 6, **Table 3**), meaning that the additional m<sup>3</sup>C residue in  
 189 the adjacent position has a small impact on duplex stability with only a 1.0 °C of  $T_m$   
 190 decrease and the further structural perturbation is 'buffered' by the first m<sup>3</sup>C  
 191 modification. By contrast, separating the two m<sup>3</sup>C modifications at C5 and C17  
 192 positions resulted in dramatic drop of  $T_m$  by 37.2 °C (entry 2 vs 8, **Table 3**). While it  
 193 has been known that RNA duplex structure is flexible to accommodate many different  
 194 chemical modifications, the wide duplex stability range that m<sup>3</sup>C could induce and the  
 195 capability of fine-tuning  $T_m$  in a position-dependent manner might be useful for  
 196 therapeutic applications, to enhance the efficacy of antisense and RNAi based  
 197 mechanisms.

198

199 **Table 3.** Melting temperatures of native and m<sup>3</sup>C-modified 22-mer RNA duplexes.

200

| Entry | Sequences                                                       | $T_m$ (°C) <sup>a</sup> | $\Delta T_m$ (°C) <sup>b</sup> |
|-------|-----------------------------------------------------------------|-------------------------|--------------------------------|
| 1     | <b>VII:</b> 5'-UGAGCUAGUAGGUUGUCUCGUU-3'                        |                         |                                |
| 2     | <b>VII</b> + 3'-ACUCGAUCAUCCAACAGAGCAA-5'                       | 71.7                    |                                |
| 3     | <b>VIII:</b> 5'-UGAGCUAGUAGGUUGU <b>m<sup>3</sup>C</b> UCGUU-3' |                         |                                |



|   |                                                                |      |       |
|---|----------------------------------------------------------------|------|-------|
| 4 | VIII + 3'-ACUCGAUCAUCCAACAGAGCAA-5'                            | 66.2 | -5.5  |
| 5 | IX: 5'-UGAGCUAGUAGGUUGUm <sup>3</sup> CUm <sup>3</sup> CGUU-3' |      |       |
| 6 | IX + 3'-ACUCGAUCAUCCAACAGAGCAA-5'                              | 65.2 | -6.5  |
| 7 | X: 5'-UGAGm <sup>3</sup> CUAGUAGGUUGUm <sup>3</sup> CUCGUU-3'  |      |       |
| 8 | X + 3'-ACUCGAUCAUCCAACAGAGCAA-5'                               | 34.5 | -37.2 |

201 <sup>a</sup> The  $T_{ms}$  were measured in sodium phosphate (10 mM, pH 7.0) buffer containing 100 mM NaCl,  $T_m$   
 202 values reported are the averages of four measurements.

203 <sup>b</sup>  $\Delta T_m$  values are relative to the native duplexes with only Watson-Crick pairs.

204

## 205 Molecular simulation studies of m<sup>3</sup>C-RNA duplex

206

207 In order to investigate more detailed structural insights into the base pairing  
 208 patterns of the m<sup>3</sup>C containing RNA duplex, we conducted molecular dynamic  
 209 simulation studies. The results from the MD simulations are summarized in **Figure 2**.  
 210 The RNA duplex was simulated in both canonical (C-G) and modified (m<sup>3</sup>C-G) forms.  
 211 We calculated the hydrogen-bonding distances between the donor-acceptor pairs for  
 212 the canonical and modified base-pairs from the ensemble of structures generated in  
 213 the production run. The curves are moved vertically for visual clarity. The canonical  
 214 C:G pair retains all the three hydrogen bonds throughout the simulation. However, in  
 215 the modified m<sup>3</sup>C-G pair, the m<sup>3</sup>C rotates for about 45 degrees to fully expose the  
 216 methyl group into the major groove and avoid the clashing with N<sup>1</sup> of the pairing G.  
 217 The conformational change observed in the m<sup>3</sup>C-G pair also allows for the single  
 218 hydrogen bond acceptor (O<sup>2</sup> of m<sup>3</sup>C) to form bifurcated hydrogen bonds with N<sup>1</sup> and  
 219 N<sup>2</sup> of guanine. The bifurcated hydrogen bonds are weaker than the normal one as  
 220 evidenced by the higher average distances and fluctuations. Similar bonding patterns  
 221 might also exist in other mis-matched pairs to minimize the discrimination of C to  
 222 other bases. Overall, we observed weakening of hydrogen bonding in the modified  
 223 m<sup>3</sup>C-G base-pair, which is consistent with our thermostability studies.

224

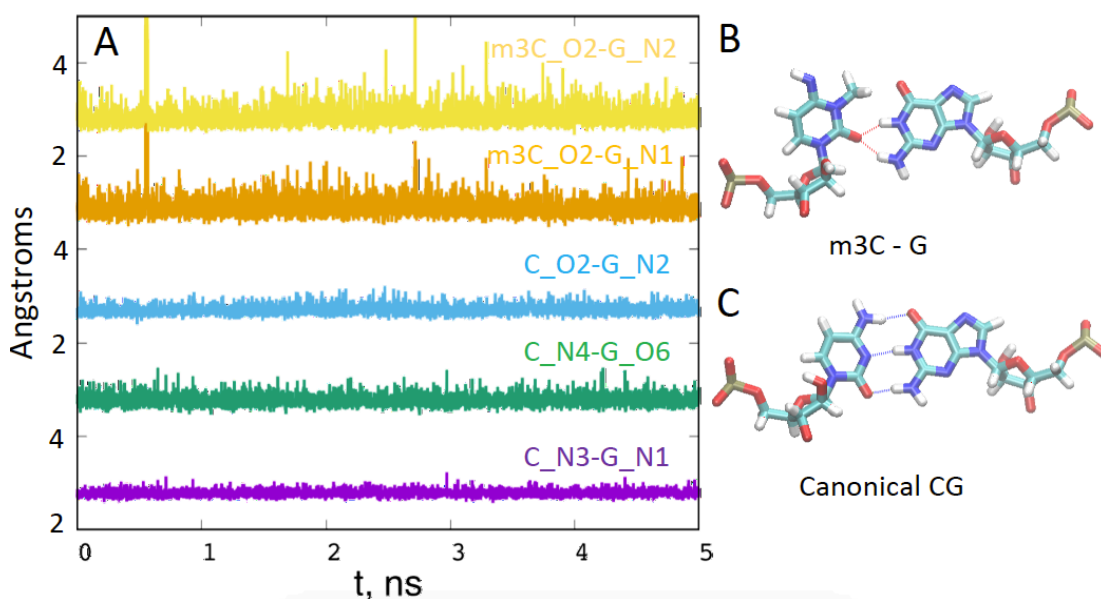

225

226 **Figure 2.** Molecular simulation results. The hydrogen bonding distances (A) vary at different  
227 time points in the RNA duplex containing m<sup>3</sup>C:G (B) and native C:G (C) pairs.

228

## 229 **Impacts of m<sup>3</sup>C modification on reverse transcription**

230 In order to study the potential biological consequences of m<sup>3</sup>C induced  
231 changes in hydrogen bonding during nucleic acid synthesis, we conducted reverse  
232 transcription assays using a modified-template directed primer extension reaction, as  
233 shown in **Figure 3**. The 5'-end of DNA primer was labeled with the fluorescent FAM  
234 group and a 31 nt-long modified RNA was used as the template, with the m<sup>3</sup>C residue  
235 as the starting site of the extension reaction, which allows the direct view of the  
236 impacts of this modification to the whole reverse transcription complex. The reverse  
237 transcription yields or fidelity with different base pairing substrates in the presence of  
238 different reverse transcriptases were quantitated by the fluorescence gel images with  
239 single-nucleotide resolution (**Figure 4-6**) and the according UV images (**Figure**  
240 **S36-S38**).

241

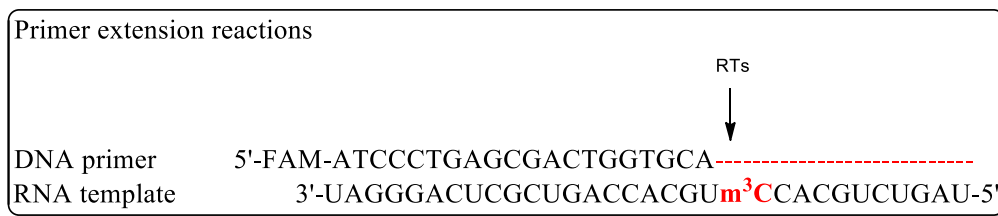

242

243 **Figure 3.** Primer extension reaction using m<sup>3</sup>C modified RNA template.

244

245 The Avian Myeloblastosis Virus Reverse Transcriptase (AMV-RT) is a widely  
246 used RNA-directed DNA polymerase in RT-PCR and RNA sequencing with high  
247 fidelity. (Myers et al., 1977) When AMV-RT was used in the presence of different  
248 dNTP substrates with native RNA template (**Figure 4A**), the reverse transcription  
249 reaction completes with all the natural dNTPs (lane Nat). AMV-RT could only use  
250 dGTP for incorporation against the starting C residue on the template, while no other  
251 dNTPs can be added to the primer (lane A, T, G, C). For AMV-RT and an m<sup>3</sup>C  
252 modified RNA template (**Figure 4B**), no full-length product was observed even in the  
253 presence of all the natural dNTPs (lane Nat vs N), indicating that this single m<sup>3</sup>C  
254 modification template completely inhibits the AMV-RT activity. Our observation is  
255 also consistent with the report that m<sup>3</sup>C acts as an RT stop residue in RT-based  
256 techniques. (Motorin et al., 2007)

257



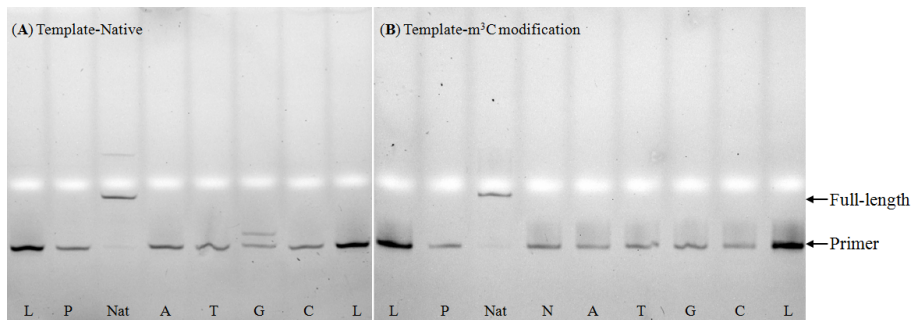

258

259 **Figure 4.** Fluorescent (A and B) gel images of standing-start primer extension reactions for AMV RT  
260 indicated using m<sup>3</sup>C containing RNA template and the corresponding natural template. Lanes: L, ladder;  
261 P, primer; Nat, natural template with all four dNTPs; A, T, G, and C, reactions in the presence of the  
262 respective dNTP; N, reactions in the presence of all four dNTPs.

263

264 By contrast, when the HIV-1-RT, which has relatively lower replication  
265 fidelity than AMV-RT, was used, it dramatically increased incorporation yield when  
266 dGTP was the lone dNTP (Figure 5A, lane G). We also observed that  
267 mis-incorporation of dATP and dTTP, but not dCTP, was present when using the  
268 HIV-1-RT (lane A, T and C). In the presence of m<sup>3</sup>C modified template (Figure 5B),  
269 we observed a very trace amount of full-length product (less than 5%) in the presence  
270 of all natural dNTPs (lanes Nat and N), supporting the idea that a single m<sup>3</sup>C  
271 modification severely inhibits the HIV-1-RT activity and results in a very low reaction  
272 yield. Interestingly, the m<sup>3</sup>C modification totally inhibits dGTP and dTTP  
273 incorporation but significantly increases the dATP incorporation yield (lanes A, T and  
274 G), resulting the order of preferential incorporation efficiency as A>>T>G, C.

275

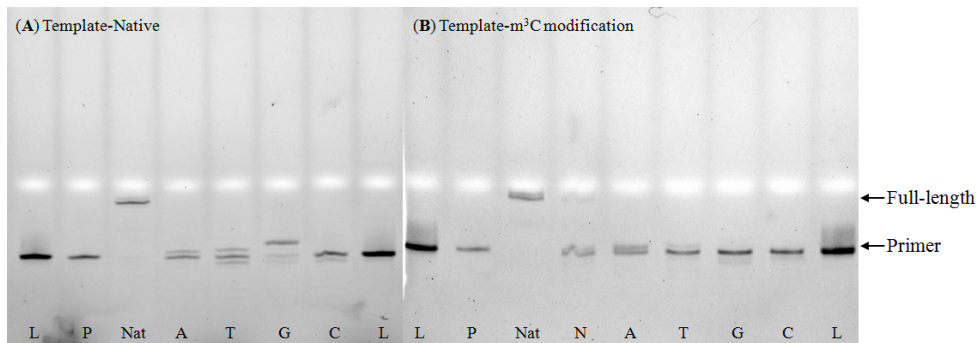

276

277 **Figure 5.** Fluorescent (A and B) gel images of standing-start primer extension reactions for HIV-1 RT  
278 indicated using m<sup>3</sup>C containing RNA template and the corresponding natural template. Lanes: L, ladder;  
279 P, primer; Nat, natural template with all four dNTPs; A, T, G, and C, reactions in the presence of the  
280 respective dNTP; N, reactions in the presence of all four dNTPs.

281

282 Subsequently, we explored the impacts of m<sup>3</sup>C on MMLV-RT, another enzyme  
283 with replication fidelity lower than AMV but higher than HIV-1 RT.(Skasko et al.,  
284 2005) MMLV-RT together with native RNA template (Figure 6A) in the reverse  
285 transcription reaction gives normal full length product in the presence of all the  
286 natural dNTPs (lane Nat). Although very high dGTP incorporation efficiency (lane G)

287 was observed for MMLV-RT, the mis-incorporation of dATP was extremely high (lane  
288 A), supporting the idea that MMLV-RT can recognize and well accommodate the C:A  
289 pair in the reverse transcription complex. Similarly, dTTP was also incorporated into  
290 the primer strand with a medium yield (lane T). On the other hand, the presence of  
291  $m^3C$  in the template inhibits the normal enzyme activity of MMLV-RT (Lane N and G  
292 in **Figure 6B**), resulting in a mixture of three major strands in the reaction system,  
293 although the full-length product inhibition is much lower than the HIV-1 RT system.  
294 However, the  $m^3C$  template modification does not impact the incorporation of dATP.  
295 As a result, a similar dNTPs incorporation efficiency order,  $A \gg T, G > C$ , as HIV-1 RT,  
296 was observed for MMLV-RT. Furthermore, when the MutiScribe<sup>TM</sup> RT, a recombinant  
297 version of MMLV RT, was applied to the system, very similar results were obtained.  
298 (**Figure 6C and 6D**).  
299

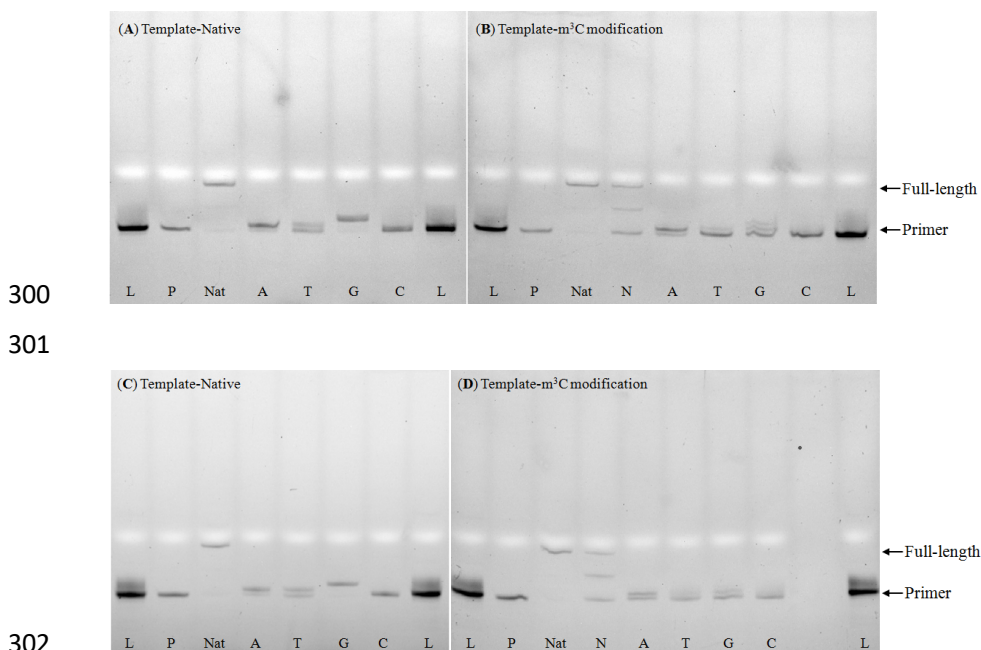

302  
303  
304 **Figure 6.** Fluorescent gel images of standing-start primer extension reactions for MMLV RT (**A and B**)  
305 and MultiScribe<sup>TM</sup> RT (**C and D**) indicated using  $m^3C$  containing RNA templates and the corresponding  
306 natural templates. Lanes: L, ladders; P, primer; Nat, natural template with all four dNTPs; A, T, G, and  
307 C, reactions in the presence of the respective dNTP; N, reactions in the presence of all four dNTPs.  
308

309 Many base modifications that do not change the Watson-Crick base pairing  
310 pattern have big impacts on the activity and fidelity of RNA polymerases, with  $m^6A$ ,  
311  $m^5C$ ,  $m^5U$ ,  $hm^5U$  being examples. (Potapov et al., 2018) The accuracy or fidelity of  
312 the base incorporation against a specific modified base on the template strand used for  
313 reverse transcription as well as the overall DNA or RNA synthesis error rates remains  
314 largely unestablished for many RNA modifications. HIV-1 RT is known as a low  
315 fidelity reverse transcriptase that catalyzes nucleotide mismatches with an error  
316 frequency of 1/2000 to 1/4000, and prefers a C:A pair over other mismatches, which  
317 frequently results in a G-to-A mutation during HIV gene replication.(Preston et al.,

318 1988) Our results suggest that although the HIV-1 RT can induce both C:A and C:T  
319 pairs using an unmodified template, the presence of the m<sup>3</sup>C modification largely  
320 enhances the C:A pair while inhibiting the C:T one. We also observed that MMLV RT  
321 and MutiScribe<sup>TM</sup> RT cases enhances the C:A pair while inhibiting the C:T one. Our  
322 results support the idea that the m<sup>3</sup>C modification could specify the C:A pair in the  
323 presence of lower fidelity reverse transcriptases, thus further increasing the G-to-A  
324 mutation rate during reverse transcription. In contrast, the m<sup>3</sup>C encountered by  
325 enzymes with higher fidelity (i.e., AMV-RT) does not specify A or induce any other  
326 base mismatch, and primary serves as an RT stop.

327

328 We do note that the overall replication using HIV-1 RT is significantly (>90%)  
329 inhibited in the presence of m<sup>3</sup>C on the template, very similar to the AMV-RT case,  
330 which completely inhibits the DNA synthesis. One would expect a lower-fidelity  
331 RNA polymerase like HIV-1 to better accommodate the unnatural base pairs and  
332 promote higher replication yields when compared to the higher-fidelity AMV-RT do.  
333 Indeed, both MMLV RT and MutiScribe<sup>TM</sup> RT, which have a fidelity between HIV-1  
334 RT and AMV-RT, show partial inhibition and result in a 50% of full-length product.  
335 Therefore, the m<sup>3</sup>C modification may have unique effects on HIV-1 RT, and allow the  
336 virus to regulate gene replication during different environmental selection stresses,  
337 which could be exploited to develop new therapeutics for HIV. Furthermore, the  
338 downstream demethylation process of m<sup>3</sup>C catalyzed by ALKBH3 may also play roles  
339 in restoring base pairing fidelity during virus replication, therefore representing  
340 another potential target in developing RNA based antiviral drugs.

341

## 342 CONCLUSION

343 In summary, we synthesized the m<sup>3</sup>C phosphoramidite and a series of RNA  
344 oligonucleotides containing the modification. Our base-pairing and specificity studies  
345 show that the m<sup>3</sup>C modification disrupts the C:G pair and significantly decreases  
346 RNA duplex stability, which also results in the loss of base pairing discrimination of  
347 C:G pair with C:A, C:T, and C:C mismatched pairs. We also demonstrated that  
348 introducing two m<sup>3</sup>C modifications in the same sides (5' or 3' side) provided relative  
349 smaller effect on *T<sub>m</sub>* compared to one modification. On the contrary, separating the  
350 two modifications could significantly reduce the duplex stability. Our molecular  
351 dynamic simulation study further reveals the detailed structural insights into the  
352 m<sup>3</sup>C:G base pairing pattern in RNA duplex. In addition, our investigation of this  
353 methylation effects on reverse transcription model demonstrated that the m<sup>3</sup>C  
354 modification could specify the C:A pair for some RT enzymes, which would induce  
355 the G to A mutation if used by low fidelity enzymes. For reverse transcriptase  
356 enzymes with higher fidelity (i.e., AMV-RT), m<sup>3</sup>C could completely shut down DNA  
357 synthesis. Our work provides detailed insights into the thermostability and the  
358 importance of m<sup>3</sup>C in RNA. Further it provides a foundation for exploiting the  
359 biochemical and biomedical potential of m<sup>3</sup>C in the design and development of RNA  
360 based therapeutics.

361

## 362 MATERIALS AND METHODS

363

### 364 Materials and general procedures of synthesis

365 Anhydrous solvents were used and redistilled using standard procedures. All solid  
366 reagents were dried under a high vacuum line prior to use. Air sensitive reactions  
367 were carried out under argon. RNase-free water, tips and tubes were used for RNA  
368 purification and thermodynamic studies. Analytical TLC plates pre-coated with silica  
369 gel F254 (Dynamic Adsorbents) were used for monitoring reactions and visualized by  
370 UV light. Flash column chromatography was performed using silica gel (32-63  $\mu\text{m}$ ).  
371 All  $^1\text{H}$ ,  $^{13}\text{C}$  and  $^{31}\text{P}$  NMR spectra were recorded on a Bruker 400 and 500 MHz  
372 spectrometer. Chemical shift values are in ppm.  $^{13}\text{C}$  NMR signals were determined by  
373 using APT technique. High-resolution MS were achieved by ESI at University at  
374 Albany, SUNY.

### 375 Synthesis of $\text{m}^3\text{C}$ phosphoramidites

376 **3-*N*-methyl-cytidine 2.** To a solution of cytidine **1** (4.86 g, 20 mmol) in dry DMF (50  
377 mL) was added iodomethane (2.5 mL, 40 mmol), and the solution was kept at room  
378 temperature during 24 hours. DMF was evaporated; the residue was evaporated with  
379 toluene (2 x 100 mL) and dissolved in acetone (20 mL). Hexane (50 mL) was added  
380 to the solution, and the resulting mixture was kept at  $-20\text{ }^\circ\text{C}$  for 1 hour. The precipitate  
381 was filtered, washed with cold mixture acetone:hexane (v/v = 1:1) (2 x 50 mL). The  
382 solid was dried in vacuum to give compound **2** (3.6 g, 14 mmol, 70% yield) as a  
383 yellow solid.  $^1\text{H}$  NMR (500 MHz, DMSO-*d*<sub>6</sub>)  $\delta$  9.79 (br, 1H), 9.15 (br, 1H), 8.31 (d,  $J$   
384 = 7.5 Hz, 1H), 6.20 (d,  $J$  = 8.0 Hz, 1H), 5.70 (d,  $J$  = 3.5 Hz, 1H), 5.51 (br, 1H), 5.17  
385 (br, 1H), 4.05-4.03 (m, 1H), 3.95-3.89 (m, 2H), 3.73 (dd,  $J$  = 2.5, 12.5 Hz, 1H), 3.60  
386 (dd,  $J$  = 2.5, 12.0 Hz, 1H), 3.35 (s, 3H).  $^{13}\text{C}$  NMR (125 MHz,  $\text{CDCl}_3$ )  $\delta$  159.4, 148.1,  
387 142.1, 94.5, 91.2, 85.1, 74.6, 69.0, 60.2, 31.2. HRMS (ESI-TOF)  $[\text{M}+\text{H}]^+ = 258.1090$   
388 (calc. 258.1090). Chemical formula:  $\text{C}_{10}\text{H}_{15}\text{N}_3\text{O}_5$ .

389 **1-(5'-*O*-4,4'-dimethoxytrityl-beta-*D*-ribofuranosyl)-3-*N*-methyl-cytidine 3.** To a  
390 solution of compound **2** (3.5 g, 13.6 mmol) in dry pyridine (40 mL) was added  
391 4,4'-dimethoxytrityl chloride (6.9 mg, 20.4 mmol). The resulting solution was stirred  
392 at RT overnight. To the suspension was added  $\text{CH}_2\text{Cl}_2$  (200 mL) and the organic layer  
393 was subsequently washed with 5% aqueous  $\text{Na}_2\text{S}_2\text{O}_3$  (2 x 100 mL), sat. aqueous  
394 sodium bicarbonate (100 mL) and brine (100 mL). The organic layer was dried by  
395 anhydrous sodium sulfate, filtered and evaporated under reduced pressure. The  
396 residue was purified by silica gel chromatography to give compound **3** (3.9 g, 5.9  
397 mmol, 43% yield) as a white solid. TLC  $R_f = 0.2$  (10% MeOH in  $\text{CH}_2\text{Cl}_2$ ).  $^1\text{H}$  NMR  
398 (400 MHz,  $\text{CDCl}_3$ )  $\delta$  7.61(d,  $J$  = 8.0 Hz, 1H), 7.39-7.36 (m, 2H), 7.28-7.16 (m, 7H),

399 6.82-6.79 (m, 4H), 5.86 (d,  $J = 3.2$  Hz, 1H), 5.76 (d,  $J = 7.2$  Hz, 1H), 4.36-4.30 (m,  
400 2H), 4.18 (m, 1H), 3.73 (d, 6H), 3.48-3.40 (m, 5H).  $^{13}\text{C}$  NMR (125 MHz,  $\text{CDCl}_3$ )  $\delta$   
401 158.9, 158.6, 149.4, 149.37, 144.5, 135.5, 135.3, 130.2, 128.2, 128.0, 113.3, 98.2,  
402 90.9, 86.9, 83.5, 74.9, 69.9, 62.5, 55.3, 30.3. HRMS (ESI-TOF)  $[\text{M}+\text{H}]^+ = 560.2390$   
403 (calc. 560.2397). Chemical formula:  $\text{C}_{31}\text{H}_{33}\text{N}_3\text{O}_7$ .

404

405 ***1-(5'-O-4,4'-dimethoxytrityl-beta-D-ribofuranosyl)-4-N-benzoyl-3-N-methyl-cytidin***  
406 **e 4**. Compound **3** (2.3 g, 4.2 mmol) was co-evaporated with pyridine (2 x 50 mL) and  
407 redissolved in pyridine (50 mL). Trimethylsilyl chloride (TMSCl) (2.1 mL, 16.8 mmol)  
408 was added and the mixture was stirred at RT for 1 h whereupon benzoyl chloride  
409 (BzCl) (0.84 mL, 5.04 mmol) was added. The resulting solution was stirred for 4 h at  
410 RT whereupon water (10 mL) was added. After stirring for 5 min at RT, aqueous  
411 ammonia (15 mL, 15.8 M) was added and the mixture was stirred for 15 min at RT  
412 and then evaporated to dryness under reduced pressure. The residue was purified by  
413 silica gel chromatography to give compound **4** (2.3 g, 3.47 mmol, 82% yield) as a  
414 white solid. TLC  $R_f = 0.4$  (50% EtOAc in  $\text{CH}_2\text{Cl}_2$ ).  $^1\text{H}$  NMR (400 MHz,  $\text{CDCl}_3$ )  $\delta$   
415 8.15-8.12 (m, 2H), 7.64 (d,  $J = 8.4$  Hz, 1H), 7.56-7.51 (m, 1H), 7.46-7.42 (m, 2H),  
416 7.35-7.33 (m, 2H), 7.29-7.18 (m, 8H), 6.84-6.80 (m, 4H), 6.25 (d,  $J = 8.4$  Hz, 1H),  
417 5.82 (d,  $J = 3.6$  Hz, 1H), 4.37-4.26 (m, 3H), 3.78 (d, 6H), 3.58 (s, 3H). 3.48 (dd,  $J =$   
418 2.8 Hz, 10.8 Hz, 1H), 3.38 (dd,  $J = 3.2$  Hz, 10.8 Hz, 1H).  $^{13}\text{C}$  NMR (125 MHz,  $\text{CDCl}_3$ )  
419  $\delta$  177.4, 158.7, 151.1, 144.1, 135.8, 135.7, 135.4, 135.2, 132.5, 130.1, 130.0, 129.7,  
420 128.2, 128.1, 128.0, 127.1, 113.31, 113.30, 98.2, 91.5, 87.1, 84.3, 76.2, 70.5, 62.2,  
421 55.2, 30.0. HRMS (ESI-TOF)  $[\text{M}+\text{H}]^+ = 664.2646$  (calc. 664.2659). Chemical  
422 formula:  $\text{C}_{38}\text{H}_{37}\text{N}_3\text{O}_8$ .

423

424 ***1-(2'-O-tert-butyldimethylsilyl-5'-O-4,4'-dimethoxytrityl-beta-D-ribofuranosyl)-4-N***  
425 ***-benzoyl-3-N-methyl-cytidine 5***. Compound **4** (1.3 g, 2 mmol) was dissolved in dry  
426 DMF (12 mL), then *tert*-butyldimethylsilyl chloride (TBDMSCl, 362 mg, 2.4 mmol)  
427 and imidazole (272 mg, 4 mmol) were added into the solution. The resulting solution  
428 was stirred overnight at RT. The solution was diluted with EtOAc (200 mL) and  
429 washed with brine (2 x 100 mL). The organic layer was dried by anhydrous sodium  
430 sulfate, filtered and evaporated under reduced pressure. The residue was purified by  
431 silica gel chromatography to give compound **5** (600 mg, 0.77 mmol, 39% yield) as a  
432 white solid. TLC  $R_f = 0.6$  (Hexane:EA = 1:1).  $^1\text{H}$  NMR (500 MHz,  $\text{CDCl}_3$ )  $\delta$   
433 8.15-8.12 (m, 2H), 7.82 (d,  $J = 8.5$  Hz, 1H), 7.55-7.50 (m, 1H), 7.46-7.42 (m, 2H),  
434 7.38-7.35 (m, 2H), 7.29-7.25 (m, 6H), 7.22-7.16 (m, 1H), 6.85-6.82 (m, 4H), 6.08 (d,  
435  $J = 8.0$  Hz, 1H), 5.94 (d,  $J = 2.5$  Hz, 1H), 4.38-4.33 (m, 1H), 4.29-4.27 (m, 1H),



436 4.09-4.06 (m, 1H), 3.78 (d,  $J = 1.0$  Hz, 6H), 3.55 (s, 3H), 3.57-3.46 (m, 2H), 0.94 (s,  
437 9H), 0.24 (s, 3H), 0.18 (s, 3H).  $^{13}\text{C}$  NMR (125 MHz,  $\text{CDCl}_3$ )  $\delta$  177.3, 158.7, 155.7,  
438 150.3, 144.1, 136.0, 135.9, 135.4, 135.2, 132.4, 130.1, 130.0, 129.7, 128.20, 128.19,  
439 128.0, 127.2, 98.1, 89.8, 87.1, 83.3, 76.8, 69.8, 61.9, 55.2, 30.0, 25.8, 18.1, -4.5, -5.2.  
440 HRMS (ESI-TOF)  $[\text{M}+\text{H}]^+ = 778.3527$  (calc. 778.3524). Chemical formula:  
441  $\text{C}_{44}\text{H}_{51}\text{N}_3\text{O}_8\text{Si}$ .

442  
443 ***1-[2'-O-tert-butyl dimethylsilyl-3'-O-(2-cyanoethyl-N,N-diisopropylamino)phosphor***  
444 ***amidite-5'-O-(4,4'-dimethoxytrityl-beta-D-ribofuranosyl)]-4-N-benzoyl-3-N-methyl-***  
445 ***cytidine 6***. To a solution of compound **5** (600 mg, 0.77 mmol) in dry DCM (13 mL)  
446 was added N,N-di-iso-propylethylamine (0.38 mL, 3.08 mmol) and 2-cyanoethyl  
447 N,N-diisopropylchlorophosphoramidite (0.23 mL, 1.54 mmol). The resulting solution  
448 was stirred overnight at room temperature under argon gas. The reaction was  
449 quenched with water and extracted with ethyl acetate. After drying the organic layer  
450 over  $\text{Na}_2\text{SO}_4$  and evaporation. The residue was purified by silica gel chromatography  
451 to give compound **6** (500 mg, 0.51 mmol, 66% yield) as a white solid. TLC  $R_f = 0.6$   
452 (Hexane:EA = 1:1).  $^1\text{H}$  NMR (400 MHz,  $\text{CDCl}_3$ )  $\delta$  8.15-8.12 (m, 2H), 7.90-7.19 (m,  
453 13H), 6.84-6.80 (m, 4H), 6.16-5.91 (m, 2H), 4.38-3.91 (m, 3H), 3.78 (s, 6H),  
454 3.61-3.36 (m, 7H), 2.67-2.37 (m, 2H), 2.06-2.04 (m, 1H), 1.29-1.14 (m, 12H),  
455 1.02-0.98 (m, 3H), 0.93-0.9 (m, 9H), 0.19-0.13 (m, 6H).  $^{31}\text{P}$  NMR (162 MHz,  $\text{CDCl}_3$ )  
456  $\delta$  149.97, 148.94. HRMS (ESI-TOF)  $[\text{M}+\text{H}]^+ = 978.4561$  (calc. 978.4602). Chemical  
457 formula:  $\text{C}_{53}\text{H}_{68}\text{N}_5\text{O}_9\text{PSi}$ .

458

### 459 **Synthesis and purification of $\text{m}^3\text{C}$ containing RNA oligonucleotides**

460

461 All oligonucleotides were chemically synthesized at 1.0  $\mu\text{mol}$  scales by solid phase  
462 synthesis using the Oligo-800 synthesizer. The  $\text{m}^3\text{C}$  phosphoramidite was dissolved in  
463 acetonitrile to a concentration of 0.1 M.  $\text{I}_2$  (0.02 M) in THF/Py/ $\text{H}_2\text{O}$  solution was used  
464 as an oxidizing reagent. Coupling was carried out using 5-ethylthio-1H-tetrazole  
465 solution (0.25 M) in acetonitrile for 12 min, for both native and modified  
466 phosphoramidites. About 3% trichloroacetic acid in methylene chloride was used for  
467 the 5'-detritylation. Synthesis was performed on control-pore glass (CPG-500)  
468 immobilized with the appropriate nucleoside through a succinate linker. All the  
469 reagents used are standard solutions obtained from ChemGenes Corporation. The  
470 oligonucleotide was prepared in DMTr off form. After synthesis, the oligos were  
471 cleaved from the solid support and fully deprotected with 1:1 v/v ammonium  
472 hydroxide solution (28%  $\text{NH}_3$  in  $\text{H}_2\text{O}$ ) and Methylamine (40% w/w aqueous solution)  
473 at 65  $^\circ\text{C}$  for 45 min. The solution was evaporated to dryness by Speed-Vac  
474 concentrator. The solid was dissolved in 100  $\mu\text{L}$  DMSO and was desilylated using a  
475 triethylamine trihydrogen fluoride ( $\text{Et}_3\text{N}\cdot 3\text{HF}$ ) solution at 65  $^\circ\text{C}$  for 2.5 h. Cooled



476 down to room temperature the RNA was precipitated by adding 0.025 mL of 3 M  
477 sodium acetate and 1 mL of ethanol. The solution was cooled to -80 °C for 1 h before  
478 the RNA was recovered by centrifugation and finally dried under vacuum.

479 The oligonucleotides were purified by IE-HPLC at a flow rate of 1 mL/min. Buffer A  
480 was 20 mM Tris-HCl, pH 8.0; buffer B 1.25M NaCl in 20 mM Tris-HCl, pH 8.0. A  
481 linear gradient from 100% buffer A to 70% buffer B in 20 min was used to elute the  
482 oligos. The analysis was carried out by using the same type of analytical column with  
483 the same eluent gradient. All the modified-oligos were checked by MALDI MS. The  
484 22-mer and 31-mer RNA oligonucleotides were purified on a preparative 20%  
485 denaturing polyacrylamide gel (PAGE).

486

#### 487 **UV-melting temperature ( $T_m$ ) study**

488 Solutions of the duplex RNAs (1.5  $\mu$ M) were prepared by dissolving the purified  
489 RNAs in sodium phosphate (10 mM, pH 7.0) buffer containing 100 mM NaCl. The  
490 solutions were heated to 95 °C for 5 min, then cooled down slowly to room  
491 temperature, and stored at 4 °C for 2 h before  $T_m$  measurement. Thermal denaturation  
492 was performed in a Cary 300 UV-Visible Spectrophotometer with a temperature  
493 controller. The temperature reported is the block temperature. Each denaturing  
494 curve was acquired at 260 nm by heating and cooling from 5 to 80 °C for four times at  
495 a rate of 0.5 °C/min. All the melting curves were repeated at least four times. The  
496 thermodynamic parameter of each strand was obtained by fitting the melting curves  
497 using the Meltwin software.

#### 498 **Molecular dynamic simulation studies**

499 To study the  $m^3C$  modification in the context of the RNA duplex in MD simulations,  
500 we developed AMBER (Cornell et al., 1995) type force-field parameters for the atoms  
501 of the modified nucleoside. We used the AM1-BCC (Jakalian et al., 2002) charge  
502 model to calculate the atomic charges, which is developed as a fast yet accurate  
503 alternate for ESP-fit using Hartree-Fock theory and 6-31G\* basis-sets (Cornell et al.,  
504 1993). AMBER99 force-field parameters were used for bonded interactions (Cornell  
505 et al., 1995), and AMBER99 parameters with Chen-Garcia corrections (Chen and  
506 Garcia, 2013) for the bases were used for LJ interactions. The unmodified RNA  
507 duplex was constructed in a-form using the Nucleic Acid Builder (NAB) suite of  
508 AMBER, and mutated to create the modification.

509

510 Molecular dynamics simulations were performed using Gromacs-2018 package  
511 (Abraham et al., 2015). The simulation system included the RNA duplex in water in a  
512 3D periodic box. The initial box size was 4.0 x 4.0 x 6.0 nm<sup>3</sup> containing the RNA  
513 duplex, 3060 water molecules, and 22 neutralizing Na<sup>+</sup> ions. The system was  
514 subjected to energy minimization to prevent any overlap of atoms, followed by a 1 ns  
515 equilibration run. The equilibrated system was then subjected to a 100 ns production  
516 run. The MD simulations incorporated leap-frog algorithm with a 2 fs timestep to  
517 integrate the equations of motion. The system was maintained at 300K and 1 bar,

518 using the velocity rescaling thermostat (Bussi et al., 2007) and Parrinello-Rahman  
519 barostat (Berendsen et al., 1984), respectively. The long-ranged electrostatic  
520 interactions were calculated using particle mesh Ewald (PME) (Darden et al., 1993)  
521 algorithm with a real space cut-off of 1.2 nm. LJ interactions were also truncated at  
522 1.2 nm. TIP3P model (Jorgensen et al., 1983) was used represent the water molecules,  
523 and LINCS (Hess et al., 1997) algorithm was used to constrain the motion of  
524 hydrogen atoms bonded to heavy atoms. Co-ordinates of the RNA molecule were  
525 stored every 20 ps for further analysis.

526

## 527 **Reverse transcription (RT) assays**

528 RT assays were performed with AMV RT (ThermoFisher), HIV-1 RT (AS ONE  
529 Corp.), MMLV RT (ThermoFisher) and MutiScribe™ RT (ThermoFisher) in 20 µL  
530 total solution containing 10X reverse transcription buffer: 50 mM Tris (pH 8.3), 75  
531 mM KCl, 3 mM MgCl<sub>2</sub>, 10 mM DTT. Final reaction mixtures contained RNA  
532 template (5 µM), DNA FAM-primer (2.5 µM) and dNTP (1 mM). After addition of  
533 Rnase inhibitor (20 U) and each RTs: AMV RT (10 U), HIV-1 RT (4 U), MMLV  
534 (100 U) and MutiScribe™ (50 U), the mixtures were incubated at 37 °C for 1 h. The  
535 reactions were quenched with stop solution [98% formamide, 0.05% xylene cyanol  
536 (FF), and 0.05% bromophenol blue], heated to 90 °C for 5 min and then cooled to 0  
537 °C at ice-bath. Reactions were analyzed by 15% PAGE 8 M urea at 250 V for 1-1.5 h.  
538 The fluorescent and UV gel imaging were done on a Bio-Rad Gel XR+ imager.

## 539 **ASSOCIATED CONTENT**

### 540 **Supporting Information**

541 Electronic Supporting Information (ESI) available: Experimental procedures, spectral  
542 data, UV-melting curves and PAGE gel UV-images.

### 543 **Competing interests**

544 The authors declare that no competing interests exist.

## 545 **ACKNOWLEDGMENTS**

546 We are grateful to NSF (CHE-1845486) and NERF grant from the University at  
547 Albany, State University of New York for the financial support. We thank Drs. Zhen  
548 Huang and Cen Chen for their help in MS-Spec experiments.

## 549 **REFERENCES**

550

551 Abraham, M.J., Murtola, T., Schulz, R., Páll, S., Smith, J.C., Hess, B., and Lindahl, E. (2015).  
552 GROMACS: High performance molecular simulations through multi-level parallelism from laptops to  
553 supercomputers. *SoftwareX* 1-2, 19-25.

- 554 Basanta-Sanchez, M., Temple, S., Ansari, S.A., D'Amico, A., and Agris, P.F. (2016). Attomole  
555 quantification and global profile of RNA modifications: Epitranscriptome of human neural stem cells.  
556 *Nucleic Acids Res.* *44*, e26.
- 557 Berendsen, H.J.C., Postma, J.P.M., van Gunsteren, W.F., DiNola, A., and Haak, J.R. (1984). Molecular  
558 dynamics with coupling to an external bath. *J. Chem. Phys.* *81*, 3684-3690.
- 559 Boccaletto, P., Machnicka, M.A., Purta, E., Piatkowski, P., Baginski, B., Wirecki, T.K., de  
560 Crecy-Lagard, V., Ross, R., Limbach, P.A., Kotter, A., *et al.* (2018). MODOMICS: a database of RNA  
561 modification pathways. 2017 update. *Nucleic Acids Res.* *46*, D303-D307.
- 562 Brookes, P., and Lawley, P.D. (1962). The Methylation of Cytosine and Cytidine. *J. Chem. Soc.*  
563 1348-1351.
- 564 Bussi, G., Donadio, D., and Parrinello, M. (2007). Canonical sampling through velocity rescaling. *J.*  
565 *Chem. Phys.* *126*, 014101.
- 566 Cantara, W.A., Crain, P.F., Rozenski, J., McCloskey, J.A., Harris, K.A., Zhang, X., Vendeix, F.A.,  
567 Fabris, D., and Agris, P.F. (2011). The RNA Modification Database, RNAMDB: 2011 update. *Nucleic*  
568 *Acids Res.* *39*, D195-201.
- 569 Chen, A.A., and Garcia, A.E. (2013). High-resolution reversible folding of hyperstable RNA tetraloops  
570 using molecular dynamics simulations. *Proc. Natl. Acad. Sci. U S A* *110*, 16820-16825.
- 571 Chen, B., Li, Y., Song, R.F., Xue, C., and Xu, F. (2019a). Functions of RNA N6-methyladenosine  
572 modification in cancer progression. *Mol. Biol. Rep.* *46*, 1383-1391.
- 573 Chen, Z., Qi, M., Shen, B., Luo, G., Wu, Y., Li, J., Lu, Z., Zheng, Z., Dai, Q., and Wang, H. (2019b).  
574 Transfer RNA demethylase ALKBH3 promotes cancer progression via induction of tRNA-derived  
575 small RNAs. *Nucleic Acids Res.* *47*, 2533-2545.
- 576 Ciuffi, A. (2016). Viral cell biology: HIV RNA gets methylated. *Nat. Microbiol.* *1*, 16037.
- 577 Clark, W.C., Evans, M.E., Dominissini, D., Zheng, G., and Pan, T. (2016). tRNA base methylation  
578 identification and quantification via high-throughput sequencing. *Rna* *22*, 1771-1784.
- 579 Cornell, W.D., Cieplak, P., Bayly, C.I., Gould, I.R., Merz, K.M., Ferguson, D.M., Spellmeyer, D.C.,  
580 Fox, T., Caldwell, J.W., and Kollman, P.A. (1995). A Second Generation Force Field for the Simulation  
581 of Proteins, Nucleic Acids, and Organic Molecules. *J. Am. Chem. Soc.* *117*, 5179-5197.
- 582 Cornell, W.D., Cieplak, P., Bayly, C.I., and Kollman, P.A. (1993). Application of RESP charges to  
583 calculate conformational energies, hydrogen bond energies, and free energies of solvation. *J. Am.*  
584 *Chem. Soc.* *115*, 9620-9631.
- 585 Cozen, A.E., Quartley, E., Holmes, A.D., Hrabeta-Robinson, E., Phizicky, E.M., and Lowe, T.M.  
586 (2015). ARM-seq: AlkB-facilitated RNA methylation sequencing reveals a complex landscape of  
587 modified tRNA fragments. *Nat. Methods* *12*, 879-884.
- 588 D'Silva, S., Haider, S.J., and Phizicky, E.M. (2011). A domain of the actin binding protein Abp140 is  
589 the yeast methyltransferase responsible for 3-methylcytidine modification in the tRNA anti-codon loop.  
590 *Rna* *17*, 1100-1110.
- 591 Darden, T., York, D., and Pedersen, L. (1993). Particle mesh Ewald: An N·log(N) method for Ewald  
592 sums in large systems. *J. Chem. Phys.* *98*, 10089-10092.
- 593 Desrosiers, R., Friderici, K., and Rottman, F. (1974). Identification of methylated nucleosides in  
594 messenger RNA from Novikoff hepatoma cells. *Proc. Natl. Acad. Sci. U S A* *71*, 3971-3975.
- 595 Fu, Y., Dominissini, D., Rechavi, G., and He, C. (2014). Gene expression regulation mediated through  
596 reversible m(6)A RNA methylation. *Nat. Rev. Genet.* *15*, 293-306.
- 597 Hall, R.H. (1963). Isolation of 3-Methyluridine and 3-Methylcytidine from Solubleribonucleic Acid.

- 598 Biochem. Biophys. Res. Commun. *12*, 361-364.
- 599 Han, L., Marcus, E., D'Silva, S., and Phizicky, E.M. (2017). *S. cerevisiae* Trm140 has two recognition  
600 modes for 3-methylcytidine modification of the anticodon loop of tRNA substrates. *Rna* *23*, 406-419.
- 601 Hess, B., Bekker, H., Berendsen, H.J.C., and Fraaije, J.G.E.M. (1997). LINCS: A linear constraint  
602 solver for molecular simulations. *J. Comput. Chem.* *18*, 1463-1472.
- 603 Holley, R.W., Apgar, J., Everett, G.A., Madison, J.T., Marquisee, M., Merrill, S.H., Penswick, J.R., and  
604 Zamir, A. (1965a). Structure of a Ribonucleic Acid. *Science* *147*, 1462-1465.
- 605 Holley, R.W., Everett, G.A., Madison, J.T., and Zamir, A. (1965b). Nucleotide Sequences in the Yeast  
606 Alanine Transfer Ribonucleic Acid. *J. Biol. Chem.* *240*, 2122-2128.
- 607 Hori, H. (2014). Methylated nucleosides in tRNA and tRNA methyltransferases. *Front. Genet.* *5*, 144.
- 608 Iwanami, Y., and Brown, G.M. (1968). Methylated bases of transfer ribonucleic acid from HeLa and L  
609 cells. *Arch. Biochem. Biophys.* *124*, 472-482.
- 610 Jakalian, A., Jack, D.B., and Bayly, C.I. (2002). Fast, efficient generation of high-quality atomic  
611 charges. AM1-BCC model: II. Parameterization and validation. *J. Comput. Chem.* *23*, 1623-1641.
- 612 Jiang, Q., Crews, L.A., Holm, F., and Jamieson, C.H.M. (2017). RNA editing-dependent  
613 epitranscriptome diversity in cancer stem cells. *Nat. Rev. Cancer* *17*, 381-392.
- 614 Jorgensen, W.L., Chandrasekhar, J., and Madura, J.D. (1983). Comparison of simple potential functions  
615 for simulating liquid water. *J. Chem. Phys.* *79*, 926-935.
- 616 Lichinchi, G., Zhao, B.S., Wu, Y., Lu, Z., Qin, Y., He, C., and Rana, T.M. (2016). Dynamics of Human  
617 and Viral RNA Methylation during Zika Virus Infection. *Cell Host Microbe* *20*, 666-673.
- 618 Liu, F., and He, C. (2017). A new modification for mammalian messenger RNA. *J. Biol. Chem.* *292*,  
619 14704-14705.
- 620 Machnicka, M.A., Milanowska, K., Osman Oglou, O., Purta, E., Kurkowska, M., Olechowik, A.,  
621 Januszewski, W., Kalinowski, S., Dunin-Horkawicz, S., Rother, K.M., *et al.* (2013). MODOMICS: a  
622 database of RNA modification pathways--2013 update. *Nucleic Acids Res.* *41*, D262-267.
- 623 McDowell, J.A., and Turner, D.H. (1996). Investigation of the structural basis for thermodynamic  
624 stabilities of tandem GU mismatches: solution structure of (rGAGGUCUC)<sub>2</sub> by two-dimensional NMR  
625 and simulated annealing. *Biochemistry* *35*, 14077-14089.
- 626 McIntyre, W., Netzband, R., Bonenfant, G., Biegel, J.M., Miller, C., Fuchs, G., Henderson, E., Arra,  
627 M., Canki, M., Fabris, D., *et al.* (2018). Positive-sense RNA viruses reveal the complexity and  
628 dynamics of the cellular and viral epitranscriptomes during infection. *Nucleic Acids Res.* *46*,  
629 5776-5791.
- 630 Mongan, N.P., Emes, R.D., and Archer, N. (2019). Detection and analysis of RNA methylation.  
631 *F1000Research* *8*.
- 632 Motorin, Y., Muller, S., Behm-Ansmant, I., and Branlant, C. (2007). Identification of modified residues  
633 in RNAs by reverse transcription-based methods. *Meth. Enzymol.* *425*, 21-53.
- 634 Myers, J.C., Spiegelman, S., and Kacian, D.L. (1977). Synthesis of full-length DNA copies of avian  
635 myeloblastosis virus RNA in high yields. *Proc. Natl. Acad. Sci. U S A* *74*, 2840-2843.
- 636 Nachtergaele, S., and He, C. (2017). The emerging biology of RNA post-transcriptional modifications.  
637 *RNA Biol.* *14*, 156-163.
- 638 Nachtergaele, S., and He, C. (2018). Chemical Modifications in the Life of an mRNA Transcript. *Annu.*  
639 *Rev. Genet.* *52*, 349-372.
- 640 Noma, A., Yi, S., Katoh, T., Takai, Y., Suzuki, T., and Suzuki, T. (2011). Actin-binding protein ABP140  
641 is a methyltransferase for 3-methylcytidine at position 32 of tRNAs in *Saccharomyces cerevisiae*. *Rna*

642 17, 1111-1119.

643 Ogilvie, K.K., and Kader, H.A. (1983). Synthesis of 3, N4-Dimethylcytidine. *Nucleosides*

644 *Nucleotides Nucleic Acids* 2, 345-350.

645 Olson, M.V., Page, G.S., Sentenac, A., Piper, P.W., Worthington, M., Weiss, R.B., and Hall, B.D.

646 (1981). Only one of two closely related yeast suppressor tRNA genes contains an intervening sequence.

647 *Nature* 291, 464-469.

648 Ougland, R., Zhang, C.M., Liiv, A., Johansen, R.F., Seeberg, E., Hou, Y.M., Remme, J., and Falnes,

649 P.O. (2004). AlkB restores the biological function of mRNA and tRNA inactivated by chemical

650 methylation. *Mol. Cell* 16, 107-116.

651 Potapov, V., Fu, X., Dai, N., Correa, I.R., Jr., Tanner, N.A., and Ong, J.L. (2018). Base modifications

652 affecting RNA polymerase and reverse transcriptase fidelity. *Nucleic Acids Res.* 46, 5753-5763.

653 Preston, B.D., Poiesz, B.J., and Loeb, L.A. (1988). Fidelity of HIV-1 reverse transcriptase. *Science*

654 242, 1168-1171.

655 Roundtree, I.A., Evans, M.E., Pan, T., and He, C. (2017). Dynamic RNA Modifications in Gene

656 Expression Regulation. *Cell* 169, 1187-1200.

657 Sergiev, P.V., Aleksashin, N.A., Chugunova, A.A., Polikanov, Y.S., and Dontsova, O.A. (2018).

658 Structural and evolutionary insights into ribosomal RNA methylation. *Nat. Chem. Biol.* 14, 226-235.

659 Shi, H., Wei, J., and He, C. (2019). Where, When, and How: Context-Dependent Functions of RNA

660 Methylation Writers, Readers, and Erasers. *Mol. Cell* 74, 640-650.

661 Skasko, M., Weiss, K.K., Reynolds, H.M., Jamburuthugoda, V., Lee, K., and Kim, B. (2005).

662 Mechanistic differences in RNA-dependent DNA polymerization and fidelity between murine leukemia

663 virus and HIV-1 reverse transcriptases. *J. Biol. Chem.* 280, 12190-12200.

664 Song, J., and Yi, C. (2017). Chemical Modifications to RNA: A New Layer of Gene Expression

665 Regulation. *ACS Chem. Biol.* 12, 316-325.

666 Ueda, Y., Ooshio, I., Fusamae, Y., Kitae, K., Kawaguchi, M., Jingushi, K., Hase, H., Harada, K., Hirata,

667 K., and Tsujikawa, K. (2017). AlkB homolog 3-mediated tRNA demethylation promotes protein

668 synthesis in cancer cells. *Sci. Rep.* 7, 42271.

669 Wang, X., Lu, Z., Gomez, A., Hon, G.C., Yue, Y., Han, D., Fu, Y., Parisien, M., Dai, Q., Jia, G., *et al.*

670 (2014). N6-methyladenosine-dependent regulation of messenger RNA stability. *Nature* 505, 117-120.

671 Wu, L. (2019). HIV Evades Immune Surveillance by Methylation of Viral RNA. *Biochemistry* 58,

672 1699-1700.

673 Wu, Y., Tang, Y., Dong, X., Zheng, Y.Y., Haruehanroengra, P., Mao, S., Lin, Q., and Sheng, J. (2020).

674 RNA Phosphorothioate Modification in Prokaryotes and Eukaryotes. *ACS Chem. Biol.* 15, 1301-1305.

675 Xu, L., Liu, X., Sheng, N., Oo, K.S., Liang, J., Chionh, Y.H., Xu, J., Ye, F., Gao, Y.G., Dedon, P.C., *et*

676 *al.* (2017). Three distinct 3-methylcytidine (m(3)C) methyltransferases modify tRNA and mRNA in

677 mice and humans. *J. Biol. Chem.* 292, 14695-14703.

678 Zaccara, S., Ries, R.J., and Jaffrey, S.R. (2019). Reading, writing and erasing mRNA methylation. *Nat.*

679 *Rev. Mol. Cell Bio.* 20, 608-624.

680
